# Supplementary material for: Parallel Tagged Next-Generation Sequencing on Pooled Samples – A New Approach for Population Genetics in Ecology and Conservation
Source: PubMed Central journal article supplement (PMC3630221; doi:10.1371/journal.pone.0061471), 2013-04-18
Supplement: pone.0061471.s001.pdf [file pone.0061471.s001.pdf]

**Table S1**

Summary of all *Cyt b* polymorphic sites within population-pools. The SNP positions are given in bp. Y and N indicate whether given SNP, as identified in individual Sanger sequence approach, was or was not detected, respectively, in our pooled population NGS approach. Coverage is given in number of reads per mapping as analyzed in CLC genomics workbench prior to SNP detection step.

| Population-Pool | SNP position | Detected in NGS (Y/N) | Coverage (number of reads) | Comment                  |
|-----------------|--------------|-----------------------|----------------------------|--------------------------|
| 1               | 330          | Y                     | 468                        |                          |
|                 | 461          | Y                     | 368                        |                          |
|                 | 579          | Y                     | 35                         |                          |
|                 | 653          | Y                     | 41                         |                          |
|                 | 761          | Y                     | 41                         |                          |
|                 | 770          | Y                     | 40                         |                          |
| 2               | 41           | N                     | 488                        |                          |
|                 | 47           | N                     | 507                        |                          |
|                 | 57           | Y                     | 511                        |                          |
|                 | 79           | N                     | 556                        |                          |
|                 | 255          | Y                     | 954                        |                          |
|                 | 284          | Y                     | 936                        |                          |
|                 | 316          | Y                     | 938                        |                          |
|                 | 330          | Y                     | 918                        |                          |
|                 | 331          | N                     | 917                        |                          |
|                 | 356          | Y                     | 884                        |                          |
|                 | 389          | Y                     | 806                        |                          |
|                 | 458          | Y                     | 685                        |                          |
|                 | 713          | Y                     | 38                         |                          |
| 3               | 17           | Y                     | 158                        |                          |
|                 | 41           | N                     | 160                        |                          |
|                 | 131          | N                     | 205                        |                          |
|                 | 152          | Y                     | 229                        |                          |
|                 | 176          | Y                     | 241                        |                          |
|                 | 260          | Y                     | 267                        |                          |
|                 | 263          | Y                     | 267                        |                          |
|                 | 284          | Y                     | 269                        |                          |
|                 | 317          | Y                     | 269                        |                          |
|                 | 326          | Y                     | 259                        |                          |
|                 | 353          | N                     | 244                        | present, but homopolymer |
|                 | 470          | N                     | 211                        |                          |
|                 | 482          | N                     | 217                        |                          |
|                 | 515          | Y                     | 233                        |                          |
|                 | 575          | Y                     | 63                         |                          |
|                 | 636          | Y                     | 68                         |                          |
|                 | 698          | Y                     | 71                         |                          |
| 740             | Y            | 71                    |                            |                          |
| 778             | Y            | 71                    |                            |                          |

**Table S1** *continued*

|    |     |   |      |                           |
|----|-----|---|------|---------------------------|
| 4  | 47  | Y | 178  |                           |
|    | 57  | Y | 185  |                           |
|    | 144 | Y | 268  |                           |
|    | 199 | Y | 307  |                           |
|    | 356 | Y | 334  |                           |
|    | 759 | N | 5    | present, but low coverage |
|    | 770 | N | 5    | present, but low coverage |
| 5  | 79  | N | 870  |                           |
|    | 89  | Y | 878  |                           |
|    | 245 | Y | 1299 |                           |
|    | 335 | N | 1251 |                           |
|    | 573 | Y | 116  |                           |
|    | 594 | N | 120  | present, but homopolymer  |
|    | 627 | Y | 127  |                           |
|    | 650 | Y | 137  |                           |
|    | 720 | Y | 136  |                           |
| 6  | 41  | Y | 486  |                           |
|    | 79  | N | 487  |                           |
|    | 113 | Y | 485  |                           |
|    | 152 | Y | 486  |                           |
|    | 326 | Y | 269  |                           |
|    | 330 | Y | 270  |                           |
|    | 636 | N | 17   | present, but low coverage |
|    | 740 | Y | 27   |                           |
|    | 774 | Y | 27   |                           |
|    | 782 | Y | 27   |                           |
|    | 800 | Y | 27   |                           |
|    | 809 | Y | 27   |                           |
| 7  | 41  | N | 180  |                           |
|    | 356 | Y | 203  |                           |
|    | 401 | Y | 213  |                           |
|    | 579 | N | 5    | present, but low coverage |
|    | 650 | N | 8    | present, but low coverage |
|    | 653 | N | 8    | low coverage              |
| 8  | 57  | Y | 88   |                           |
|    | 356 | Y | 111  |                           |
|    | 594 | N | 4    | present, but low coverage |
|    | 650 | N | 3    | low coverage              |
|    | 744 | N | 2    | present, but low coverage |
| 9  | 79  | N | 1249 |                           |
|    | 182 | Y | 739  |                           |
| 10 | 255 | Y | 65   |                           |
|    | 305 | N | 93   | present, but homopolymer  |
|    | 330 | N | 111  | present, but homopolymer  |
|    | 356 | Y | 112  |                           |
|    | 389 | Y | 114  |                           |
|    | 458 | Y | 117  |                           |
|    | 699 | N | 25   | homopolymer               |

Table S1 *continued*

|       |     |     |              |                           |
|-------|-----|-----|--------------|---------------------------|
| 11    | 41  | N   | 201          |                           |
|       | 86  | Y   | 201          |                           |
|       | 158 | N   | 208          | present, but homopolymer  |
|       | 263 | N   | 93           | present, but homopolymer  |
|       | 335 | Y   | 198          |                           |
|       | 356 | Y   | 199          |                           |
|       | 515 | Y   | 231          |                           |
|       | 608 | N   | 7            | low coverage              |
|       | 653 | N   | 14           | present, but low coverage |
|       | 693 | N   | 16           | low coverage              |
| 778   | N   | 15  | low coverage |                           |
| <hr/> |     |     |              |                           |
| 12    | 89  | Y   | 127          |                           |
|       | 573 | N   | 7            | present, but low coverage |
|       | 627 | N   | 8            | present, but low coverage |
|       | 650 | N   | 13           | present, but low coverage |
|       | 720 | N   | 13           | present, but low coverage |
| <hr/> |     |     |              |                           |
| 13    | 41  | Y   | 260          |                           |
|       | 152 | Y   | 264          |                           |
|       | 326 | Y   | 196          |                           |
|       | 330 | Y   | 198          |                           |
|       | 636 | N   | 27           | present, but low coverage |
|       | 681 | N   | 38           | present, but low coverage |
|       | 740 | Y   | 37           |                           |
|       | 774 | Y   | 37           |                           |
|       | 782 | Y   | 37           |                           |
|       | 800 | Y   | 37           |                           |
| 809   | Y   | 37  |              |                           |
| <hr/> |     |     |              |                           |
| 14    | 41  | N   | 56           |                           |
|       | 330 | N   | 24           | present, but low coverage |
|       | 461 | Y   | 40           |                           |
|       | 579 | N   | 6            | present, but low coverage |
|       | 638 | N   | 17           | present, but low coverage |
|       | 653 | N   | 17           | present, but low coverage |
|       | 761 | N   | 16           | present, but low coverage |
|       | 770 | N   | 16           | present, but low coverage |
| <hr/> |     |     |              |                           |
| 15    | 41  | N   | 1279         |                           |
|       | 62  | Y   | 1365         |                           |
|       | 137 | Y   | 1850         |                           |
|       | 222 | Y   | 2183         |                           |
|       | 272 | Y   | 2085         |                           |
|       | 456 | Y   | 1733         |                           |
|       | 543 | Y   | 1947         |                           |
|       | 599 | Y   | 242          |                           |
| 636   | Y   | 277 |              |                           |
| <hr/> |     |     |              |                           |
| 16    | 41  | N   | 465          |                           |
|       | 330 | Y   | 894          |                           |
|       | 461 | Y   | 736          |                           |
|       | 516 | Y   | 780          |                           |
|       | 579 | Y   | 50           |                           |
|       | 653 | Y   | 65           |                           |
|       | 761 | Y   | 65           |                           |
|       | 770 | Y   | 65           |                           |
| <hr/> |     |     |              |                           |
| 17    | 79  | N   | 480          |                           |

**Table S1** *continued*

|    |     |   |     |                           |
|----|-----|---|-----|---------------------------|
| 18 | 50  | Y | 440 |                           |
|    | 356 | Y | 846 |                           |
|    | 650 | N | 42  | present, but homopolymer  |
|    | 653 | Y | 42  |                           |
|    | 728 | N | 41  | homopolymer               |
|    | 732 | Y | 41  |                           |
| 19 | 86  | Y | 195 |                           |
|    | 89  | Y | 195 |                           |
|    | 573 | N | 8   | present, but low coverage |
|    | 627 | N | 11  | present, but low coverage |
|    | 650 | N | 11  | present, but low coverage |
|    | 720 | N | 11  | present, but low coverage |
| 20 | 255 | Y | 354 |                           |
|    | 326 | Y | 346 |                           |
|    | 330 | Y | 341 |                           |
|    | 336 | Y | 339 |                           |
|    | 356 | Y | 335 |                           |
|    | 389 | Y | 318 |                           |
|    | 458 | Y | 272 |                           |
|    | 803 | Y | 42  |                           |
