# Supplementary material for: Parallel Tagged Next-Generation Sequencing on Pooled Samples – A New Approach for Population Genetics in Ecology and Conservation
Source: PubMed Central journal article supplement (PMC3630221; doi:10.1371/journal.pone.0061471), 2013-04-18
Supplement: pone.0061471.s002.pdf [file pone.0061471.s002.pdf]

**Table S2**

Linear regression model summary statistics for comparison of two approaches (pooled and individual) based on nucleotide diversity ( $\pi$ ) and pairwise population differentiation ( $F_{ST}$ ) estimates from only “non-zero” values of *Leiopelma hochstetteri* 16S and 830-bp *Cyt b* data.

| <b>Statistics</b> | <b>N</b> | <b>Intercept (SE)</b> | <b>Slope <math>\beta</math> (95% CI)</b> | <b>R<sup>2</sup></b> |
|-------------------|----------|-----------------------|------------------------------------------|----------------------|
| <b>16S</b>        |          |                       |                                          |                      |
| $\pi$             | 7        | 0.002 (0.007)         | 0.964 (0.756 - 1.172)                    | 0.94                 |
| $F_{ST}$          | 186      | 0.330 (0.043)         | 0.638 (0.546 - 0.731)                    | 0.50                 |
| <b>Cyt b</b>      |          |                       |                                          |                      |
| $\pi$             | 11       | 0.007 (0.010)         | 0.475 (-0.301 - 1.252)                   | 0.14                 |
| $F_{ST}$          | 190      | 0.378 (0.060)         | 0.597 (0.470 - 0.725)                    | 0.31                 |

N: number of populations ( $\pi$ ) or population-pairs ( $F_{ST}$ )
